# Supplementary material
Source: publisher figshare collection journal article supplement (https://rs.figshare.com/ndownloader/files/12601811)
Supplement: Supplementary file 1 [file 12601811]

**Appendix S4.** Sensitivity analysis of sampling radius for FSLE standard deviation values used in GAMM comparing foraging dive and transit locations.

**Figure S2.** Results of GAMMs relating foraging locations to standard deviation values within radii of 15 km (left), 25 km (middle), and 50 km (right).
